# Supplementary material for: The impact of health on economic and social outcomes in the United Kingdom: A scoping literature review
Source: PLoS One. 2018 Dec 31;13(12):e0209659. doi: 10.1371/journal.pone.0209659 (PMC6312330; doi:10.1371/journal.pone.0209659)
Supplement: S2 File — (XLS) [file pone.0209659.s004.xls]

## Sheet: Quality appraisal tool
Table A.
Adapted version of the Newcastle-Ottawa Quality Assessment Form for Cohort Studies				Thresholds for categorising studies as of good, fair, and poor quality according to the adapted Newcastle-Ottawa scale:
Note: A study can be given a maximum of one star for each numbered item within the Selection, Design and Outcome categories. A maximum of two stars can be given for Adjustment.				Good quality: 2 or 3 stars in selection domain AND somewhat or truly representative AND 1 or 2 stars in adjustment domain AND 1 star in design domain AND 1 or 2 stars in outcome domain AND 1 star for adequacy for follow-up of cohorts Fair quality: 1 star in selection domain AND 1 star in adjustment domain AND 0 or 1 star in design domain AND 0 or 1 star in outcome domain Poor quality: 0 stars in …
Selection
1) Representativeness of the sample
a) Truly representative (one star)
b) Somewhat representative (one star)
c) Selected group
d) No description of the derivation of the cohort
2) Ascertainment of exposure
a) Secure record (e.g., surgical record) (one star)
b) Structured interview (one star)
c) Self report
d) No description
e) Other
3) Demonstration that outcome of interest was not present at start of study (or was controlled for at start of study)
a) Yes (includes cases where outcome could not be present prior the exposure) (one star)
b) No
Adjustment
1) Adjusted confounders
a) Used causal inference methods (e.g. instrumental variables or fixed effects models) (two stars)
b) Controlled for a rich set of confounders (one star)
c) Not adequately controlled (controlled confounders limited to sex, marital status, socioeconomic status)
Design
1) Type of study design used
a) longitudinal (one star)
b) cross-sectional
Outcome
1) Assessment of outcome
a) Independent blind assessment (one star)
b) Record linkage (one star)
c) Self report
d) No description
e) Other
2) Adequacy of follow-up of cohorts
a) Complete follow up- all subject accounted for (one star)
b) Subjects lost to follow up unlikely to introduce bias- number lost less than or equal to 20% or description of those lost suggested no different from those followed. (one star)
c) Follow up rate less than 80% and no description of those lost
d) No statement

## Sheet: Quality appraisal
Table B.
		SELECTION			ADJUSTMENT	DESIGN	OUTCOME
Author(year)	Life stage	Representativeness	Ascertainment of exposure	Demonstration of outcome of interest was not present at the start of study	Adjusted confounders	Type of study design used	Assessment of outcome	Adequacy of follow-up of cohorts	Quality rating (total no of stars)
Asher et al. (2013)	Life stage 1	Truly representative*	Structured interview*	Yes*	Controlled for a rich set of confounders including antecedents of health*	Cross-sectional	Self report	Follow up rate less than 80% and no description of those lost	Fair (4)
Blane et al. (2008)	Life stage 3	Truly representative*	Secure record (e.g., surgical record)*	Yes*	Controlled for a rich set of confounders*	Longitudinal*	Self report	Subjects lost to follow up unlikely to introduce bias- number lost less than or equal to 20% or description of those lost suggested no different from those followed.*	Good (6)
Booth et al. (2014)	Life stage 1	Truly representative*	Secure record (e.g., surgical record)*	No	Controlled for a rich set of confounders including antecedents of health*	Longitudinal*	Record linkage*	Subjects lost to follow up unlikely to introduce bias- number lost less than or equal to 20% or description of those lost suggested no different from those followed.*	Good (6)
Butland et al. (2010)	Life stage 1	Truly representative*	Other (parental report)	Yes*	Controlled for a rich set of confounders including antecedents of health*	Longitudinal*	Self report	Subjects lost to follow up unlikely to introduce bias- number lost less than or equal to 20% or description of those lost suggested no different from those followed.*	Good (5)
Byford et al. (2013)	Life stage 1	Somewhat representative*	Other (teacher report)	Yes*	Controlled for a rich set of confounders including antecedents of health*	Longitudinal*	Self report	Follow up rate less than 80% and no description of those lost	Fair (4)
Caes et al. (2014)	Life stage 1	Selected group	Self report	No	Not adequately controlled	Cross-sectional	Self report	No statement	Poor (0)
Candon (2015)	Life stage 3	Truly representative*	Self report	Yes*	Controlled for a rich set of confounders including antecedents of health*	Longitudinal*	Self report	Follow up rate less than 80% and no description of those lost	Fair (4)
Case & Paxson (2008)	Life stage 1	Truly representative*	Secure record (e.g., surgical record)*	Yes*	Controlled for a rich set of confounders including antecedents of health*	Longitudinal*	Self report	No statement	Fair (5)
Case et al. (2005)	Life stage 1	Truly representative*	Secure record (e.g., surgical record)*	Yes*	Controlled for a rich set of confounders including antecedents of health*	Longitudinal*	Self report	Follow up rate less than 80% and no description of those lost	Fair (5)
Chatzitheochari et al. (2016)	Life stage 1	Truly representative*	Other (parental/teacher report)	No	Controlled for a rich set of confounders including antecedents of health*	Longitudinal*	Self report	Subjects lost to follow up unlikely to introduce bias- number lost less than or equal to 20% or description of those lost suggested no different from those followed.*	Fair (4)
Chin et al. (2011)	Life stage 1	Truly representative*	Secure record (e.g., surgical record)*	Yes*	Controlled for a rich set of confounders including antecedents of health*	Longitudinal*	Self report	Subjects lost to follow up unlikely to introduce bias- number lost less than or equal to 20% or description of those lost suggested no different from those followed.*	Good (6)
Chittleborough et al (2012)	Life stage 2	Truly representative*	Self report	Yes	Controlled for a rich set of confounders including antecedents of health*	Longitudinal*	Self report	Subjects lost to follow up unlikely to introduce bias- number lost less than or equal to 20% or description of those lost suggested no different from those followed.*	Good (5)
Clarke & McKay (2012)	Life stage 2	No description of the derivation of the cohort	Structured interview*	No	Not adequately controlled	Longitudinal*	Self report	No statement	Poor (2)
Colman et al. (2009)	Life stage 1	Somewhat representative*	Other (teacher report)	Yes*	Controlled for a rich set of confounders including antecedents of health*	Longitudinal*	Self report	Follow up rate less than 80% and no description of those lost	Fair (4)
Conti et al. (2011)	Life stage 1	Truly representative*	Secure record (e.g., surgical record)*	Yes*	Used causal inference methods**	Longitudinal*	Self report	No statement	Fair (6)
Currie & Hyson (1999)	Life stage 1	Truly representative*	Secure record (e.g., surgical record)*	Yes*	Controlled for a rich set of confounders including antecedents of health*	Longitudinal*	Record linkage/self-report*	Subjects lost to follow up unlikely to introduce bias- number lost less than or equal to 20% or description of those lost suggested no different from those followed.*	Good (7)
Denny & Doyle (2007)	Life stage 2	Truly representative*	Self report	No	Controlled for a rich set of confounders including antecedents of health*	Longitudinal*	Self report	No statement	Fair (3)
Disney et al. (2006)	Life stage 3	Truly representative*	Self report	Yes*	Controlled for a rich set of confounders including antecedents of health*	Longitudinal*	No description	Subjects lost to follow up unlikely to introduce bias- number lost less than or equal to 20% or description of those lost suggested no different from those followed.*	Good (5)
Egan et al. (2015)	Life stage 1	Truly representative*	Self report	Yes*	Controlled for a rich set of confounders including antecedents of health*	Longitudinal*	Self report	Subjects lost to follow up unlikely to introduce bias- number lost less than or equal to 20% or description of those lost suggested no different from those followed.*	Good (5)
Farmer (1995)	Life stage 1	Somewhat representative*	Other (parental/teacher report)	Yes*	Controlled for a rich set of confounders including antecedents of health*	Longitudinal*	Self report	Subjects lost to follow up unlikely to introduce bias- number lost less than or equal to 20% or description of those lost suggested no different from those followed.*	Good (5)
Flouri et al. (2007)	Life stage 1	Truly representative*	Other (parental report)	Yes*	Controlled for a rich set of confounders including antecedents of health*	Longitudinal*	Self report	Follow up rate less than 80% and no description of those lost	Fair (4)
Frijters et al. (2014)	Life stage 1/3	Truly representative*	Other (range of methods)	Yes*	Controlled for a rich set of confounders including antecedents of health*	Longitudinal* (life satge 1)/ Cross-sectional (life stage 3)	Self report	Subjects lost to follow up unlikely to introduce bias- number lost less than or equal to 20% or description of those lost suggested no different from those followed.*	Good (5; life stage 1); Fair (4; life stage 3)
Garcia-Gomez et al. (2010)	Life stage 2	Truly representative*	Self report	Yes*	Controlled for a rich set of confounders including antecedents of health*	Longitudinal*	Self report	Subjects lost to follow up unlikely to introduce bias- number lost less than or equal to 20% or description of those lost suggested no different from those followed.*	Good (5)
Goodman et al. (2011)	Life stage 1	Truly representative*	Secure record (e.g., surgical record)*	Yes*	Controlled for a rich set of confounders including antecedents of health*	Longitudinal*	Self report	Subjects lost to follow up unlikely to introduce bias- number lost less than or equal to 20% or description of those lost suggested no different from those followed.*	Good (6)
Gregg & Machin (2000)	Life stage 1	Truly representative*	Other (record linkage/parental report)	Yes*	Controlled for a rich set of confounders including antecedents of health*	Longitudinal*	Record linkage*	No statement	Fair (5)
Griffiths et al. (2006)	Life stage 1	Truly representative*	Secure record (e.g., surgical record)*	No	Not adequately controlled	Longitudinal*	Independent blind assessment*	No statement	Poor (4)
Griffiths et al. (2011)	Life stage 1	Truly representative*	Secure record (e.g., surgical record)*	Yes*	Controlled for a rich set of confounders including antecedents of health*	Longitudinal*	Other	Subjects lost to follow up unlikely to introduce bias- number lost less than or equal to 20% or description of those lost suggested no different from those followed.*	Good (6)
Henderson et al. (2012)	Life stage 2	Truly representative*	Self report	Yes*	Controlled for a rich set of confounders*	Longitudinal*	Self report	Subjects lost to follow up unlikely to introduce bias- number lost less than or equal to 20% or description of those lost suggested no different from those followed.*	Good (5)
Henderson et al. (2013)	Life stage 1/2	Truly representative*	Other (parental report/self report)	Yes*	Controlled for a rich set of confounders including antecedents of health*	Longitudinal*	Self report	Subjects lost to follow up unlikely to introduce bias- number lost less than or equal to 20% or description of those lost suggested no different from those followed.*	Good (5)
Holme et al. (2013)	Life stage 1	Truly representative*	Secure record (e.g., surgical record)*	Yes*	Controlled for a rich set of confounders including antecedents of health*	Longitudinal*	Record linkage*	Follow up rate less than 80% and no description of those lost	Fair (6)
Jackson (2010)	Life stage 1	Truly representative*	Secure record (e.g., surgical record)*	Yes*	Controlled for a rich set of confounders including antecedents of health*	Longitudinal*	Self report	Subjects lost to follow up unlikely to introduce bias- number lost less than or equal to 20% or description of those lost suggested no different from those followed.*	Good (6)
Jackson (2015)	Life stage 1	Truly representative*	Secure record (e.g., surgical record)*	Yes*	Controlled for a rich set of confounders including antecedents of health*	Longitudinal*	Independent blind assessment*	Subjects lost to follow up unlikely to introduce bias- number lost less than or equal to 20% or description of those lost suggested no different from those followed.*	Good (7)
Jivraj & Nazroo (2014)	Life stage 3	Truly representative*	Self report	No	Not adequately controlled	Cross-sectional	Self report	Subjects lost to follow up unlikely to introduce bias- number lost less than or equal to 20% or description of those lost suggested no different from those followed.*	Poor (2)
Jivraj et al. (2016)	Life stage 3	Truly representative*	Self report	Yes*	Controlled for a rich set of confounders including antecedents of health*	Longitudinal*	Self report	Subjects lost to follow up unlikely to introduce bias- number lost less than or equal to 20% or description of those lost suggested no different from those followed.*	Good (5)
Johnston et al. (2013)	Life stage 1/2	Truly representative*	Self report	Yes*	Controlled for a rich set of confounders including antecedents of health*	Longitudinal*	Self report	Subjects lost to follow up unlikely to introduce bias- number lost less than or equal to 20% or description of those lost suggested no different from those followed.*	Good (5)
Jones et al. (2010)	Life stage 3	Truly representative*	Self report	Yes*	Controlled for a rich set of confounders including antecedents of health*	Longitudinal*	Self report	Subjects lost to follow up unlikely to introduce bias- number lost less than or equal to 20% or description of those lost suggested no different from those followed.*	Good (5)
Kelly et al. (2016)	Life stage 1	Truly representative*	Secure record (e.g., surgical record)*	No	Controlled for a rich set of confounders including antecedents of health*	Longitudinal*	Other	Complete follow up- all subject accounted for*	Good (5)
Khandaker et al. (2015)	Life stage 1	Truly representative*	Other (parental report)	Yes*	Controlled for a rich set of confounders including antecedents of health*	Longitudinal*	Independent blind assessment*	Follow up rate less than 80% and no description of those lost	Fair (5)
Kline & Tobias (2008)	Life stage 1	Truly representative*	Other (parental report/self report)	No	Used causal inference methods**	Longitudinal*	Self report	No statement	Fair (4)
Knapp et al. (2011)	Life stage 1	Truly representative*	Other (parental/teacher report/medical examination)	Yes*	Controlled for a rich set of confounders*	Longitudinal*	Self report	Subjects lost to follow up unlikely to introduce bias- number lost less than or equal to 20% or description of those lost suggested no different from those followed.*	Good (5)
Lee & Jackson (2015)	Life stage 1	Truly representative*	Secure record (e.g., surgical record)*	No	Used causal inference methods**	Longitudinal*	Self report	Subjects lost to follow up unlikely to introduce bias- number lost less than or equal to 20% or description of those lost suggested no different from those followed.*	Good (6)
Lindeboom et al. (2010)	Life stage 2	Truly representative*	Secure record (e.g., surgical record)*	No	Used causal inference methods**	Longitudinal*	Self report	Subjects lost to follow up unlikely to introduce bias- number lost less than or equal to 20% or description of those lost suggested no different from those followed.*	Good (6)
Lindeboom et al. (2016)	Life stage 2	Truly representative*	Self report	Yes*	Used causal inference methods**	Longitudinal*	Self report	Subjects lost to follow up unlikely to introduce bias- number lost less than or equal to 20% or description of those lost suggested no different from those followed.*	Good (6)
Manor et al. (2003)	Life stage 2	Truly representative*	Self report	Yes*	Controlled for a rich set of confounders including antecedents of health*	Longitudinal*	Self report	Subjects lost to follow up unlikely to introduce bias- number lost less than or equal to 20% or description of those lost suggested no different from those followed.*	Good (5)
Mars et al. (2014)	Life stage 1	Truly representative*	Self report	Yes*	Controlled for a rich set of confounders including antecedents of health*	Longitudinal*	Record linkage*	Follow up rate less than 80% and no description of those lost	Fair (5)
Matthews et al. (2017)	Life stage 3	Truly representative*	Self report	Yes*	Controlled for a rich set of confounders*	Longitudinal*	Self report	Follow up rate less than 80% and no description of those lost	Fair (4)
Maughan & Taylor (2001)	Life stage 1	Truly representative*	Structured interview*	Yes*	Controlled for a rich set of confounders including antecedents of health*	Longitudinal*	Self report	Subjects lost to follow up unlikely to introduce bias- number lost less than or equal to 20% or description of those lost suggested no different from those followed.*	Good (6)
Montgomery et al. (1996)	Life stage 1	Somewhat representative*	Other (teacher report/medical examination)	Yes*	Controlled for a rich set of confounders including antecedents of health*	Longitudinal*	Self report	Follow up rate less than 80% and no description of those lost	Fair (4)
Morris et al. (2006)	Life stage 2	Truly representative*	Secure record (e.g., surgical record)*	Yes*	Used causal inference methods**	Longitudinal*	Record linkage*	Subjects lost to follow up unlikely to introduce bias- number lost less than or equal to 20% or description of those lost suggested no different from those followed.*	Good (8)
Murasko (2007)	Life stage 1	Truly representative*	Secure record (e.g., surgical record)*	Yes*	Controlled for a rich set of confounders including antecedents of health*	Longitudinal*	Self report	Subjects lost to follow up unlikely to introduce bias- number lost less than or equal to 20% or description of those lost suggested no different from those followed.*	Good (6)
Nishida et al. (2016)	Life stage 1/3	Truly representative*	Self report	No	Controlled for a rich set of confounders including antecedents of health*	Longitudinal* (life stage 1)/ Cross-sectional (life stage 3)	Self report	Follow up rate less than 80% and no description of those lost	Fair (3; life stage 1)/ Fair (2; life stage 3)
Palloni et al. (2009)	Life stage 1	Truly representative*	Secure record (e.g., surgical record)*	Yes*	Controlled for a rich set of confounders including antecedents of health*	Longitudinal*	Self report	Follow up rate less than 80% and no description of those lost	Fair (5)
Peet et al. (2015)	Life stage 1	Truly representative*	Secure record (e.g., surgical record)*	Yes*	Used causal inference methods**	Longitudinal*	Self report	Follow up rate less than 80% and no description of those lost	Fair (6)
Persico et al. (2004)	Life stage 1	Somewhat representative*	Secure record (e.g., surgical record)*	Yes*	Controlled for a rich set of confounders including antecedents of health*	Longitudinal*	Self report	No statement	Fair (5)
Rahi et al. (2006)	Life stage 1	Truly representative*	Secure record (e.g., surgical record)*	Yes*	Controlled for a rich set of confounders including antecedents of health*	Cross-sectional	Self report	Subjects lost to follow up unlikely to introduce bias- number lost less than or equal to 20% or description of those lost suggested no different from those followed.*	Fair (5)
Rahi et al. (2009a)	Life stage 2	Truly representative*	Secure record (e.g., surgical record)*	No	Controlled for a rich set of confounders*	Cross-sectional	Self report	Subjects lost to follow up unlikely to introduce bias- number lost less than or equal to 20% or description of those lost suggested no different from those followed.*	Fair (4)
Rahi et al. (2009b)	Life stage 2	Truly representative*	Secure record (e.g., surgical record)*	No	Controlled for a rich set of confounders*	Cross-sectional	Self report	Subjects lost to follow up unlikely to introduce bias- number lost less than or equal to 20% or description of those lost suggested no different from those followed.*	Good (5)
Rice et al. (2011)	Life stage 3	Truly representative*	Self report	Yes*	Controlled for a rich set of confounders including antecedents of health*	Longitudinal*	Self report	Subjects lost to follow up unlikely to introduce bias- number lost less than or equal to 20% or description of those lost suggested no different from those followed.*	Good (5)
Rouxel et al. (2015)	Life stage 3	Truly representative*	Self report	Yes*	Controlled for a rich set of confounders*	Cross-sectional	Self report	Subjects lost to follow up unlikely to introduce bias- number lost less than or equal to 20% or description of those lost suggested no different from those followed.*	Fair (4)
Rumball-Smith et al. (2014)	Life stage 3	Truly representative*	Self report	Yes*	Not adequately controlled	Longitudinal*	Self report	Follow up rate less than 80% and no description of those lost	Poor (3)
Sargent & Blanchflower (1994)	Life stage 1/2	Truly representative*	Secure record (e.g., surgical record)*	Yes*	Controlled for a rich set of confounders including antecedents of health*	Longitudinal*	Self report	Follow up rate less than 80% and no description of those lost	Fair (5)
Sayal et al. (2015)	Life stage 1	Truly representative*	Other (parental report)	Yes*	Controlled for a rich set of confounders including antecedents of health*	Longitudinal*	Record linkage*	Subjects lost to follow up unlikely to introduce bias- number lost less than or equal to 20% or description of those lost suggested no different from those followed.*	Good (6)
Schick & Steckel (2015)	Life stage 1/2	Truly representative*	Secure record (e.g., surgical record)*	No	Controlled for a rich set of confounders including antecedents of health*	Longitudinal* (life satge 1)/ Cross-sectional (life stage 2)	Independent blind assessment*	Subjects lost to follow up unlikely to introduce bias- number lost less than or equal to 20% or description of those lost suggested no different from those followed.*	Good (6; life stage 1)/ Fair (5; life stage 2)
Scholder et al. (2012)	Life stage 1	Truly representative*	Secure record (e.g., surgical record)*	No	Used causal inference methods**	Longitudinal*	Record linkage*	Subjects lost to follow up unlikely to introduce bias- number lost less than or equal to 20% or description of those lost suggested no different from those followed.*	Good (7)
Sibbald et al. (1992)	Life stage 1	Truly representative*	Other (parental/self report)	Yes*	Controlled for a rich set of confounders including antecedents of health*	Longitudinal*	Self report	Follow up rate less than 80% and no description of those lost	Fair (4)
Stafford et al. (2017)	Life stage 3	Somewhat representative*	Secure record (e.g., surgical record)*	Yes*	Controlled for a rich set of confounders including antecedents of health*	Longitudinal*	Self report	Subjects lost to follow up unlikely to introduce bias- number lost less than or equal to 20% or description of those lost suggested no different from those followed.*	Good (6)
Stansfeld et al. (2007)	Life stage 1/2	Truly representative*	Other (teacher/self report)	Yes (Stage 1*)/No (Stage 2)	Controlled for a rich set of confounders including antecedents of health*	Longitudinal*	Self report	Subjects lost to follow up unlikely to introduce bias- number lost less than or equal to 20% or description of those lost suggested no different from those followed.*	Good (5; life stage 1)/ Fair (4; life stage 2)
Teyhan et al. (2015)	Life stage 1	Truly representative*	Other (parental report)	Yes*	Controlled for a rich set of confounders including antecedents of health*	Longitudinal*	Self report	Subjects lost to follow up unlikely to introduce bias- number lost less than or equal to 20% or description of those lost suggested no different from those followed.*	Good (5)
Trevisan & Zantormio (2016)	Life stage 3	Truly representative*	Self report	Yes*	Used causal inference methods**	Longitudinal*	Self report	Follow up rate less than 80% and no description of those lost	Fair (5)
Viner & Cole (2005)	Life stage 1	Truly representative*	Secure record (e.g., surgical record)*	Yes*	Controlled for a rich set of confounders including antecedents of health*	Longitudinal*	Self report	Subjects lost to follow up unlikely to introduce bias- number lost less than or equal to 20% or description of those lost suggested no different from those followed.*	Good (6)
Washbrook et al. (2013)	Life stage 1	Truly representative*	Self report	Yes*	Controlled for a rich set of confounders including antecedents of health*	Longitudinal*	Record linkage*	Subjects lost to follow up unlikely to introduce bias- number lost less than or equal to 20% or description of those lost suggested no different from those followed.*	Good (6)
Waylen et al. (2009)	Life stage 2	Truly representative*	Self report	Yes*	Controlled for a rich set of confounders including antecedents of health*	Longitudinal*	Self report	Subjects lost to follow up unlikely to introduce bias- number lost less than or equal to 20% or description of those lost suggested no different from those followed.*	Good (5)
Webb et al. (2011)	Life stage 3	Truly representative*	Self report	Yes*	Controlled for a rich set of confounders*	Cross-sectional	Self report	Follow up rate less than 80% and no description of those lost	Fair (3)
Wikman et al. (2011)	Life stage 3	Truly representative*	Self report	No	Not adequately controlled	Cross-sectional	Self report	Complete follow up- all subject accounted for*	Poor (2)
Williams et al. (2011)	Life stage 1	Truly representative*	Self report	Yes*	Controlled for a rich set of confounders including antecedents of health*	Longitudinal*	Record linkage*	Subjects lost to follow up unlikely to introduce bias- number lost less than or equal to 20% or description of those lost suggested no different from those followed.*	Good (6)
Williams et al. (2016)	Life stage 3	Truly representative*	Self report	Yes*	Not adequately controlled	Longitudinal*	Self report	No statement	Poor (3)
Woodhead et al. (2015)	Life stage 2	Truly representative*	Secure record (e.g., surgical record)*	Yes*	Controlled for a rich set of confounders*	Longitudinal*	Self report	Subjects lost to follow up unlikely to introduce bias- number lost less than or equal to 20% or description of those lost suggested no different from those followed.*	Good (6)
Zaninotto et al. (2009)	Life stage 3	Truly representative*	Self report	Yes*	Controlled for a rich set of confounders*	Longitudinal*	Self report	Subjects lost to follow up unlikely to introduce bias- number lost less than or equal to 20% or description of those lost suggested no different from those followed.*	Good (5)
Zaninotto et al. (2010)	Life stage 3	Truly representative*	Secure record (e.g., surgical record)*	Yes*	Controlled for a rich set of confounders*	Longitudinal*	Self report	Subjects lost to follow up unlikely to introduce bias- number lost less than or equal to 20% or description of those lost suggested no different from those followed.*	Good (6)
Zaninotto et al. (2016)	Life stage 3	Truly representative*	Self report	Yes*	Controlled for a rich set of confounders*	Longitudinal*	Self report	Subjects lost to follow up unlikely to introduce bias- number lost less than or equal to 20% or description of those lost suggested no different from those followed.*	Good (5)
